# Supplementary material
Source: PubMed Central journal article supplement (PMC4559527)
Supplement: 15_038_Di_Suppl.pdf [file 15_038_Di_Suppl.pdf]

# Methylene Blue Reduces Acute Cerebral Ischemic Injury via the Induction of Mitophagy

Yao Di,<sup>1</sup> Yun-Ling He,<sup>1</sup> Tong Zhao,<sup>1</sup> Xin Huang,<sup>1</sup> Kui-Wu Wu,<sup>1</sup> Shu-Hong Liu,<sup>1</sup> Yong-Qi Zhao,<sup>1</sup> Ming Fan,<sup>1,2,3</sup> Li-Ying Wu,<sup>1</sup> and Ling-Ling Zhu<sup>1,2</sup>

Online address: <http://www.molmed.org>

The Feinstein Institute  
for Medical Research   
Empowering Imagination. Pioneering Discovery.®

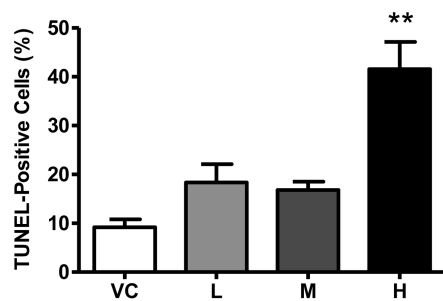

**Supplementary Figure S1.** The effect of MB on apoptosis at 24 h after MCAO. The quantification of the percentage of apoptotic cells based on the TUNEL staining in the brain sections. n=25; \*\*P<0.01 compared with the VC.

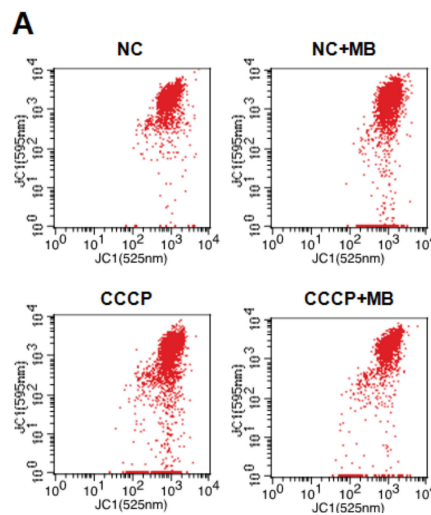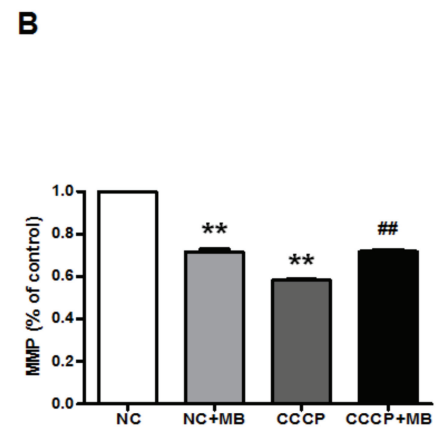

**Supplementary Figure S2.** The alleviation of MB on the decline of MMP induced by CCCP. (A) Flow cytometric analysis of MMP based on the fluorescence of JC-1. (B) Quantification of the MMP. n=4; \*\*P<0.01 compared with the NC, ##P<0.01 compared with the CCCP treatment.

**A**

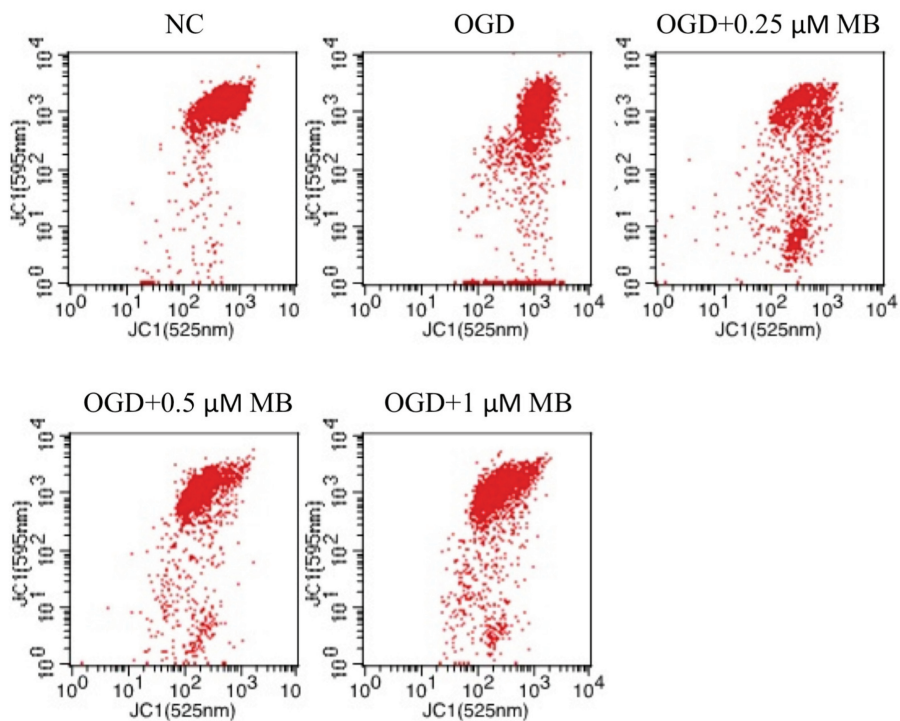

**B**

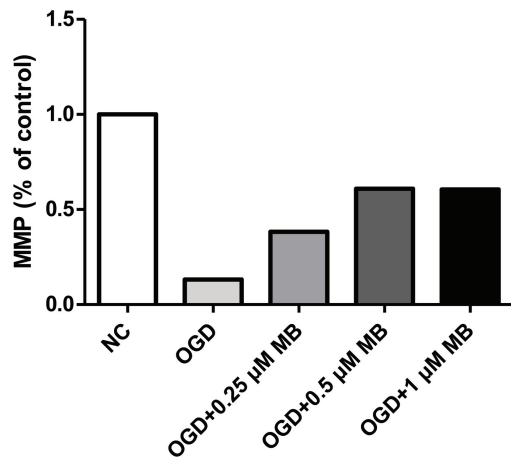

**Supplementary Figure S3.** The effects of different concentrations of MB on the MMP after cells were exposed to OGD for 2 h. (A) Flow cytometric analysis of MMP based on the fluorescence of JC-1. (B) The graphical representation of MMP flow cytometric analysis.
